# Supplementary material for: Chemical modification of vertically aligned graphene standing on SiC microspheres for selective oxidation
Source: Royal Society of Chemistry journal article supplement (doi:10.1039/c8nj05103h), 2018-11-21
Supplement: c8nj05103h1.pdf [file c8nj05103h1.pdf]

## Supporting Information

### **<sup>1</sup>Chemical modification of vertically aligned graphene standing on SiC microspheres for selective oxidation**

Jun Ma<sup>1,2\*</sup>, Yiwei Fei<sup>1</sup>, Jianqiang Hu<sup>1</sup>, Nan Wu<sup>1</sup>, Shian Sun<sup>1</sup>, Feng Xie<sup>1</sup>, Gongyi Li<sup>2</sup>,  
Xiaodong Li<sup>2</sup>, Yuelun Wang<sup>3,\*</sup>

<sup>1</sup> Air Force Logistics College, Xuzhou, 221000, People's Republic of China;

<sup>2</sup>College of Science, National University of Defense Technology, Changsha, 410073,  
People's Republic of China;

<sup>3</sup>Key Laboratory of Coal Processing and Efficient Utilization, Ministry of Education,  
China University of Mining & Technology, Xuzhou, 221116, People's Republic of  
China.

---

<sup>1\*</sup>Corresponding author. E-mail: manudt@nudt.edu.cn (Jun Ma); E-mail: wangyuelun@126.com (Yuelun Wang)

## 1. The XPS surveys of the oxidized MG on SiC

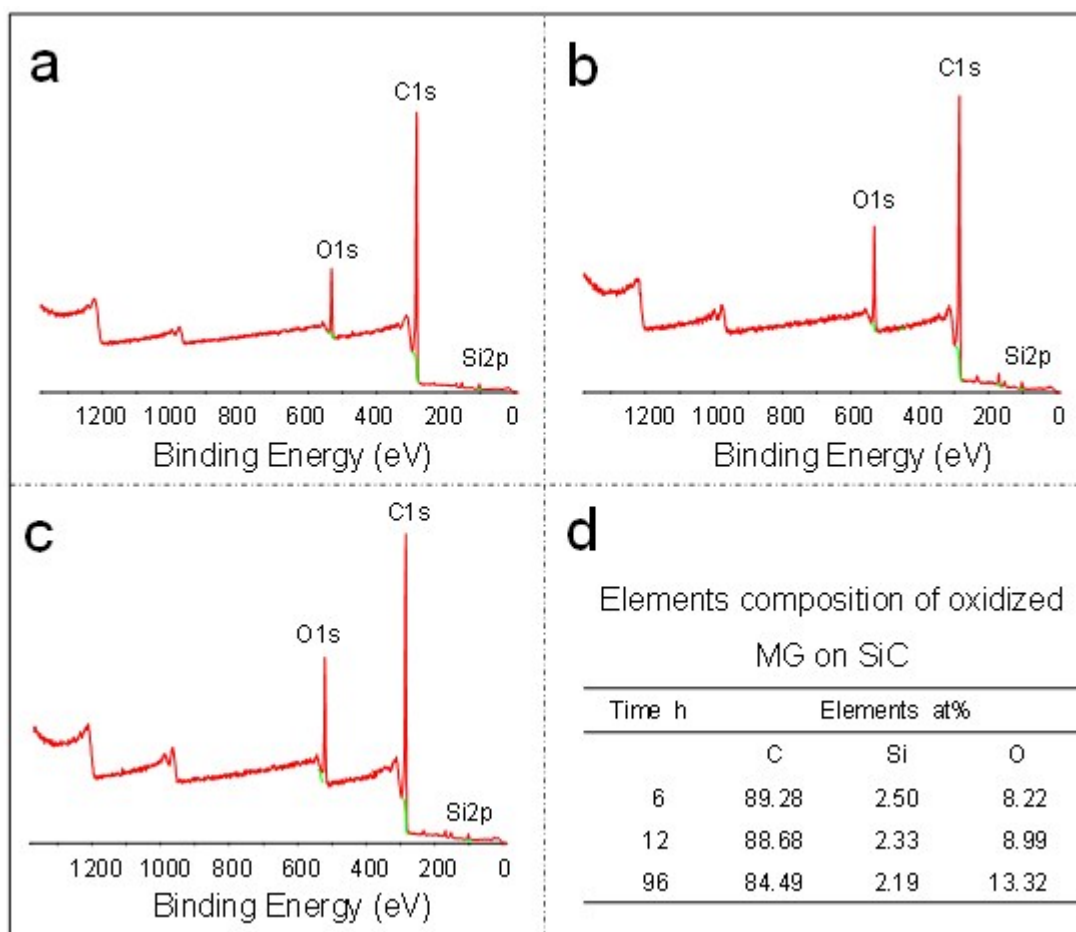

Figure 1s The XPS spectra of the MG on SiC oxidized in concentrated  $\text{HNO}_3$  for 6 (a), 12 (b), 96 (c) hours, respectively; the elements composition on the surface (d) of oxidized MG on SiC

## 2. C1s high resolution XPS analysis of the oxidized MG on SiC

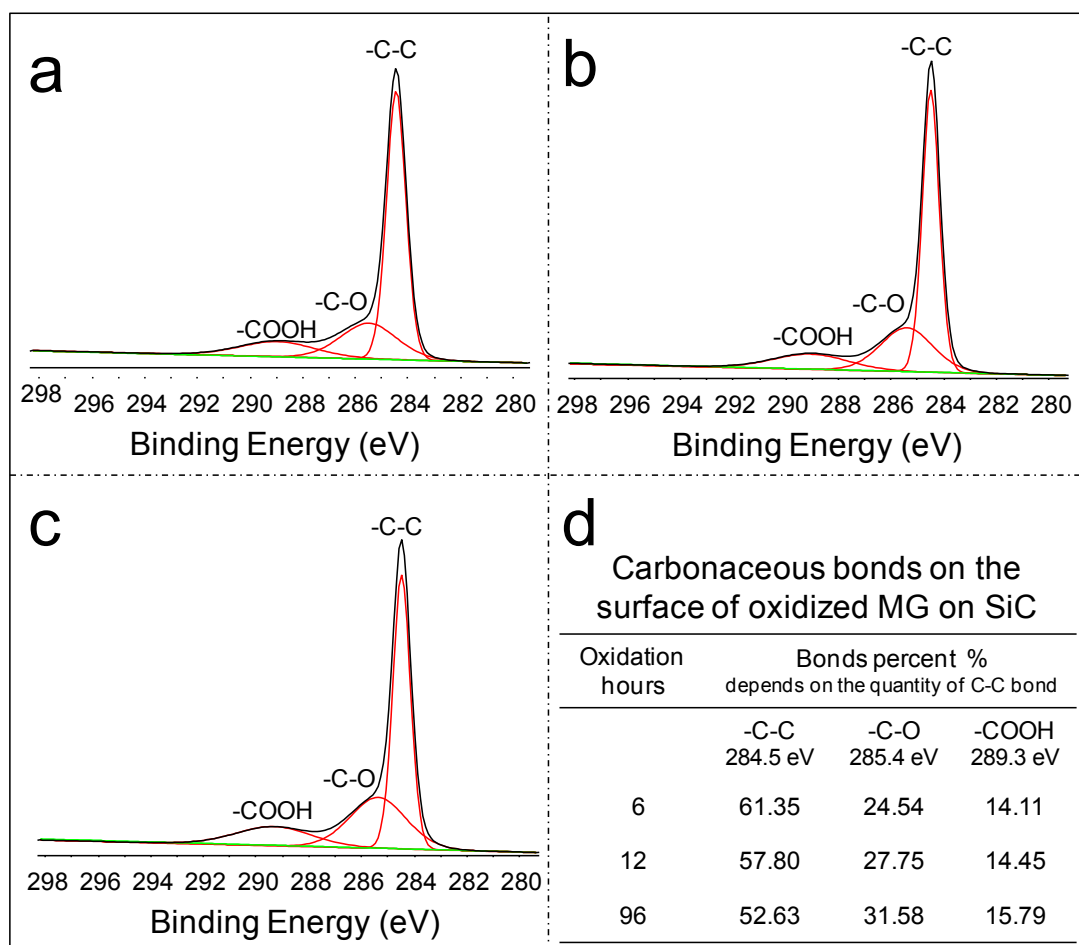

Figure 2s The high resolution C1s XPS analysis of the oxidized MG on SiC after treated in concentrated HNO<sub>3</sub> for 6 (a), 12 (b), 96 (c) hours, respectively; (d) the calculated carbonaceous bonds on the surface of the MG on SiC

### 3. N1s high resolution XPS analysis of the NG on SiCm samples

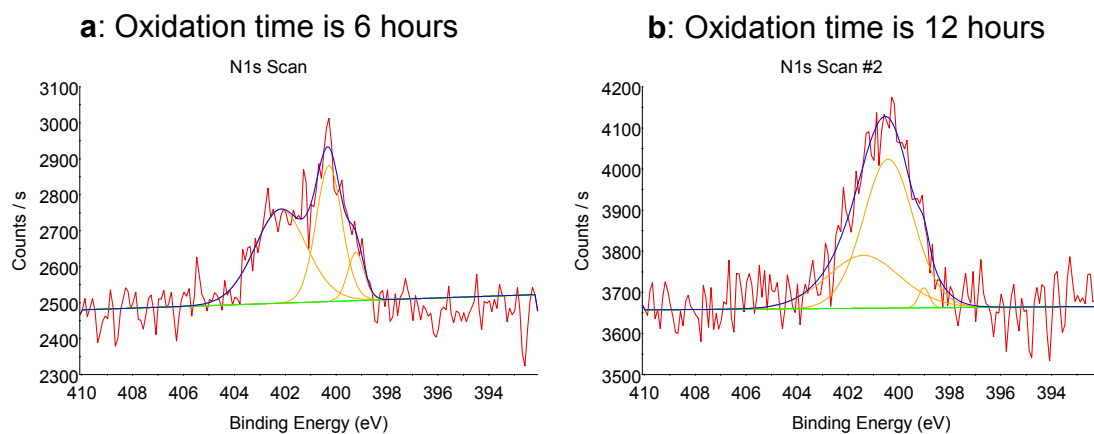

Figure 3s The N1s high resolution XPS analysis of the NG on SiCm prepared by the reactions between hydrazine and the MG on SiC oxidized in concentrated  $\text{HNO}_3$  for 6 (a) and 12 (b) hours, respectively.

#### 4. Raman spectra of NG on SiCm samples

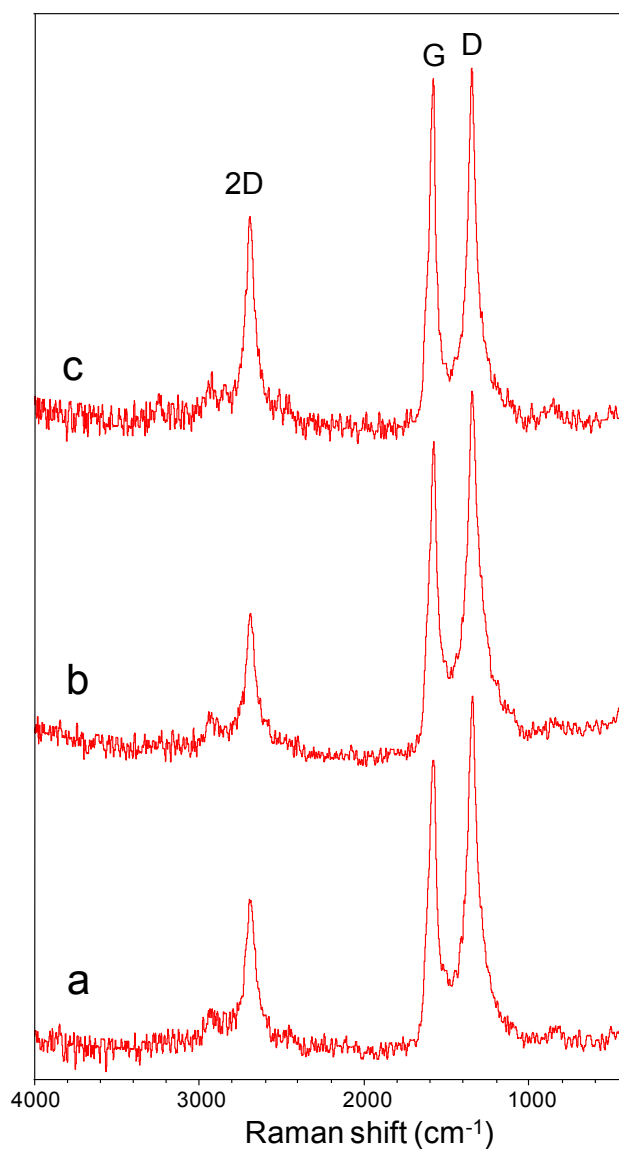

Figure 4s The Raman spectra of NG on SiCm which prepared by the reduction reactions with hydrazine and oxidized MG on SiC that treated in concentrated  $\text{HNO}_3$  for 6 (a), 12 (b) and 96 (c) hours.

## 5. The XRD pattern of the NG on SiCm

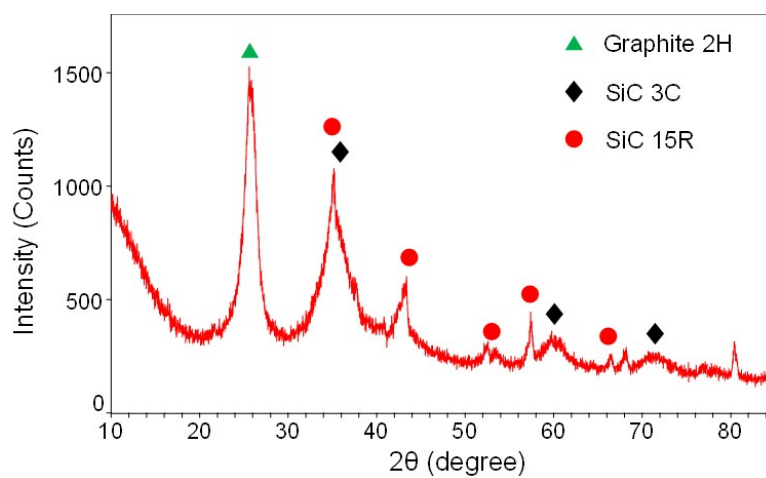

Figure 5s The XRD pattern of the NG on SiCm prepared by the reactions between hydrazine and the MG on SiC oxidized in concentrated  $\text{HNO}_3$  for 96 hours

**6. The  $I_D/I_G$  and  $I_{2D}/I_G$  value of the NG on SiCm samples based on the Raman analysis**

Table 1s The  $I_D/I_G$  and  $I_{2D}/I_G$  values of the NG on SiCm samples (prepared by the reactions between hydrazine and the MG on SiC oxidized in  $HNO_3$  for 6, 12 and 96 hours)

| Oxidation Time | $I_D/I_G$ | $I_{2D}/I_G$ |
|----------------|-----------|--------------|
| 96 hours       | 1.028     | 0.615        |
| 12 hours       | 1.151     | 0.469        |
| 6 hours        | 1.206     | 0.548        |

## 7. The selectivity oxidation of benzyl alcohol with NG on SiCm as catalyst

Table 2s The selectivity oxidation of benzyl alcohol with NG on SiCm as catalyst

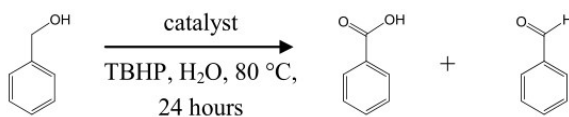

| Catalyst   | N [at%] | Conversion Rate [%] | Yield [%] |      |
|------------|---------|---------------------|-----------|------|
| None       | 0       | 7.4                 | 2.0       | 5.4  |
| MG on SiC  | 0       | 36.3                | 14.8      | 21.5 |
| NG on SiCm | 1.88    | 50.4                | 33.3      | 17.1 |
| NG on SiCm | 2.01    | 72.4                | 60.0      | 12.4 |
| NG on SiCm | 2.14    | 99.9                | 99.1      | 0.08 |

Footnote: Typical reaction conditions: benzyl alcohol (5 m mol), TBHP (30 m mol), catalyst (20 mg), 24 hours, 80 °C. The conversion rate and selectivity were examined by GCMS while *n*-dodecane was applied as internal standard.
